# Supplementary material
Source: Springer Nature journal article supplement (https://www.springermedizin.de/resource/supplementary/13643_2011_14_MOESM1_ESM.pdf/9681288)

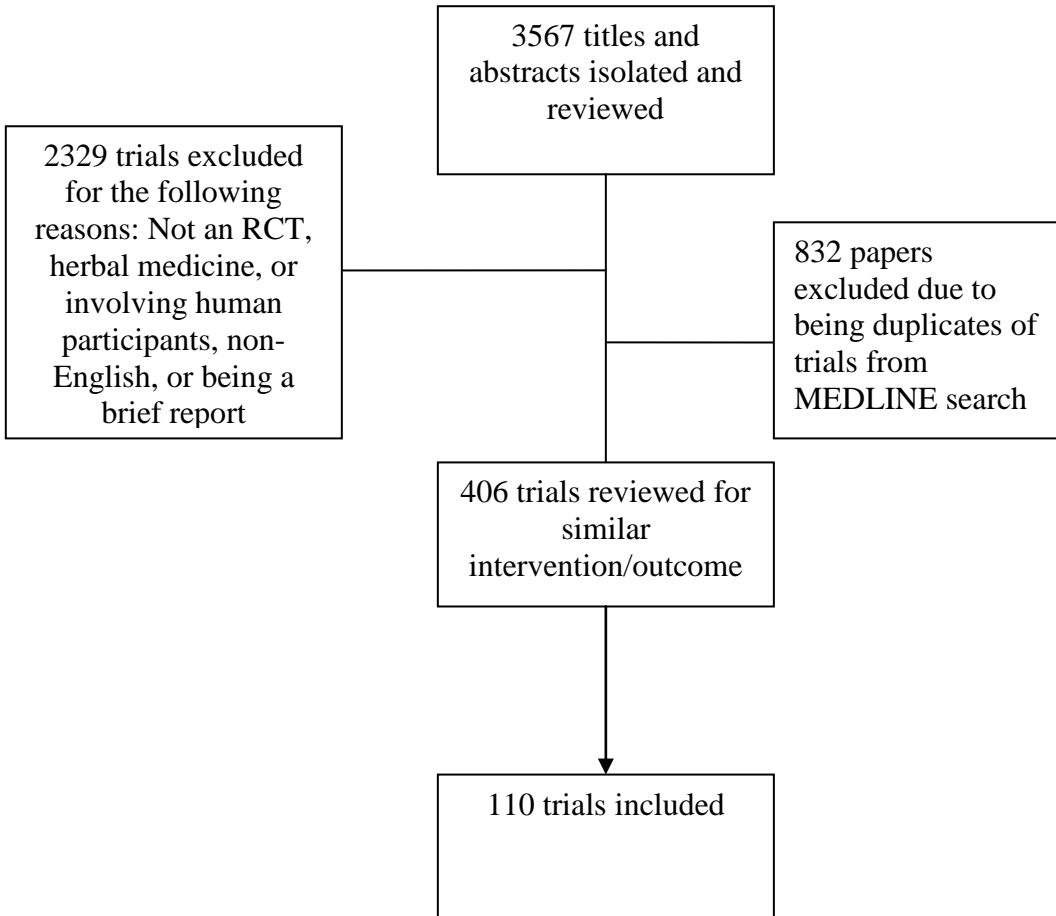

Supplement: MOESM1 [file 9681288]
